# Supplementary material for: Comparative Transcriptome Analysis Reveals Coordinated Transcriptional Regulation of Central and Secondary Metabolism in the Trichomes of Cannabis Cultivars
Source: MDPI journal article supplement (doi:10.3390/ijms23158310), 2022-07-27
Supplement: s1 [file s1]

**Table S2.** Accession number of terpene synthases used in Figure 5.

| <b>Gene</b> | <b>Genbank ID</b> | <b>Strain</b>  |
|-------------|-------------------|----------------|
| CsTPS1FN    | ARE72253.1        | Finola         |
| CsTPS2FN    | ARE72261.1        | Finola         |
| CsTPS3FN    | ARE72257.1        | Finola         |
| CsTPS4FN    | ARE72260.1        | Finola         |
| CsTPS5FN    | ARE72256.1        | Finola         |
| CsTPS6FN    | ARE72259.1        | Finola         |
| CsTPS7FN    | ARE72250.1        | Finola         |
| CsTPS8FN    | ARE72252.1        | Finola         |
| CsTPS9FN    | ARE72251.1        | Finola         |
| CsTPS14CT   | QCY41294.1        | Canna Tsu      |
| CsTPS15CT   | QCY41293.1        | Canna Tsu      |
| CsTPS16CC   | QCQ18307.1        | Cherry Chem    |
| CsTPS18VF   | QCY41292.1        | Valley Fire    |
| CsTPS19BL   | QCY41291.1        | Black Lime     |
| CsTPS20CT   | QCY41290.1        | Canna Tsu      |
| CsTPS3GT    | MW713051          | Ghost OG x NBK |
| CsTPS4WS    | MW713052          | Westside OG    |
| CsTPS5TH    | MW713053          | Tahoe OG x NBK |
| CsTPS31     | QLC36839.1        | Purple Kush    |
| CsTPS29     | QLC36833.1        | Purple Kush    |
| CsTPS35     | QLC36840.1        | Lemon Skunk    |
| CsTPS32     | QLC36849.1        | Purple Kush    |
| CsTPS34     | QLC36841.1        | Purple Kush    |
| CsTPS36     | QLC36836.1        | Purple Kush    |
| CsTPS65     | QLC36850.1        | Purple Kush    |
| CsTPS66     | QLC36851.1        | Purple Kush    |
| CsTPS5(PK)  | QLC36846.1        | Purple Kush    |
| CsTPS16     | QLC36843.1        | Purple Kush    |
| CsTPS17     | QLC36835.1        | Afghan Kush    |
| CsTPS18     | QLC36838.1        | Chocolope      |
| CsTPS20     | QLC36834.1        | Lemon Skunk    |
| CsTPS21     | QLC36848.1        | Afghan Kush    |
| CsTPS22     | QLC36842.1        | Purple Kush    |
| CsTPS23     | QLC36845.1        | Chocolope      |
| CsTPS25     | QLC36837.1        | Lemon Skunk    |
| CsTPS26     | QLC36844.1        | Purple Kush    |
| CsTPS28     | QLC36847.2        | Purple Kush    |
