# Supplementary material for: Comparative Transcriptome Analysis Reveals Coordinated Transcriptional Regulation of Central and Secondary Metabolism in the Trichomes of Cannabis Cultivars
Source: MDPI journal article supplement (doi:10.3390/ijms23158310), 2022-07-27
Supplement: s1 [file s1]

**Table S7.** Percentage by mass for selected secondary metabolites in the five Cannabis cultivars.

| Metabolite             | Cultivar |      |       |       |       |
|------------------------|----------|------|-------|-------|-------|
|                        | WS       | CD   | HB    | TH    | GT    |
| THC                    | 21.9     | 19.0 | 14-22 | 14-21 | 15-20 |
| CBD                    | 0.06     | <1   | <1    | <1    | <1    |
| CBDA                   | 1.32     | 0.1  | -     | -     | -     |
| $\beta$ -Caryophyllene | 0.89     | 0.78 | 0.13  | 0.17  | 0.15  |
| Limonene               | 0.54     | 0.10 | 0.18  | 0.39  | 0.27  |
| $\beta$ -Myrcene       | 0.28     | 0.09 | 0.50  | 0.57  | 0.62  |

Numbers represent percentage of metabolites. “-” refers to no information available. The data was obtained from two websites: <https://www.hytiva.com/> and <https://mcrlabs.com/>.
