# Supplementary material for: Comparative Transcriptome Analysis Reveals Coordinated Transcriptional Regulation of Central and Secondary Metabolism in the Trichomes of Cannabis Cultivars
Source: MDPI journal article supplement (doi:10.3390/ijms23158310), 2022-07-27
Supplement: s1 [file s1]

**Table S1.** List of primers used in this study.

| <b>Name</b>         | <b>Sequence (5' to 3')</b>                                         | <b>Purpose</b>           |
|---------------------|--------------------------------------------------------------------|--------------------------|
| CsTPS3GT_f          | CACCATGACGCAGTTAGGAGTAATCTCCAGTAGTAC                               | Cloning                  |
| CsTPS3GT_r<br>1     | TTAAATTGGAATTGGATCGAAGAACATGTTGACAACCTT<br>TGGTCTTAAGATATC         | Cloning                  |
| CsTPS3GT_r<br>2     | AATTGGAATTGGATCGAAGAACATGTTGACAACCTTGG<br>TCTTAAGATATC             | Subcellular localization |
| CsTPS3GT_<br>qPCR_f | CATGCCTTGGATCTTCCACT                                               | Quantitative PCR         |
| CsTPS3GT_<br>qPCR_r | AGAACCACTCCACCACCTTG                                               | Quantitative PCR         |
| CsTPS4WS<br>_f      | CACCATGTCATCGATTATTTATTCCCCGTTTACTTCTCT<br>ACTTC                   | Cloning                  |
| CsTPS4WS_<br>r1     | TTATTTTTTTTATTTTAGTTTTATGGTTGTATGTGAGTCT<br>CCAAGTCCATTAATTGGTTTGG | Cloning                  |
| CsTPS4WS<br>_r2     | TTTTTTTATTTTAGTTTTATGGTTGTATGTGAGTCTCCA<br>AGTCCATTAATTGGTTTGG     | Subcellular localization |
| CsTPS4WS_<br>qPCR_f | GGAGGATGCCAAGATCTGAA                                               | Quantitative PCR         |
| CsTPS4WS_<br>qPCR_r | AAATTTTCCCACCACCTTCC                                               | Quantitative PCR         |
| CsTPS5TH_f          | CACCATGGCTTCTCCCTTTCTTTATGTCCCTTCTAAAC                             | Cloning                  |
| CsTPS5TH_r<br>1     | TTATATTGTTTGATGAGAGAGAAGTGAGTTGATATAAT<br>TCTGGAGGCC               | Cloning                  |
| CsTPS5TH_r<br>2     | TATTGTTTGATGAGAGAGAAGTGAGTTGATATAATTCT<br>GGAGGCC                  | Subcellular localization |
| CsTPS5TH_<br>qPCR_f | AACATTCCAGGCCTTGTGTC                                               | Quantitative PCR         |
| CsTPS5TH_<br>qPCR_r | GGCGTTCCCACTCATTTTTTA                                              | Quantitative PCR         |
| CsGAPDH_q<br>PCR_f  | GCACCTATGTTCTGTGGTTGG                                              | Quantitative PCR         |
| CsGAPDH_q<br>PCR_r  | ACGGTCTTCTGTGTTGCTGT                                               | Quantitative PCR         |
